# Supplementary material for: Modeling an equivalent b‐value in diffusion‐weighted steady‐state free precession
Source: PubMed Central journal article supplement (PMC7216928; doi:10.1002/mrm.28169), 2020-01-10
Supplement: MRM-84-873-s001.pdf [file MRM-84-873-s001.pdf]

## Supporting Information

### Supporting Figures

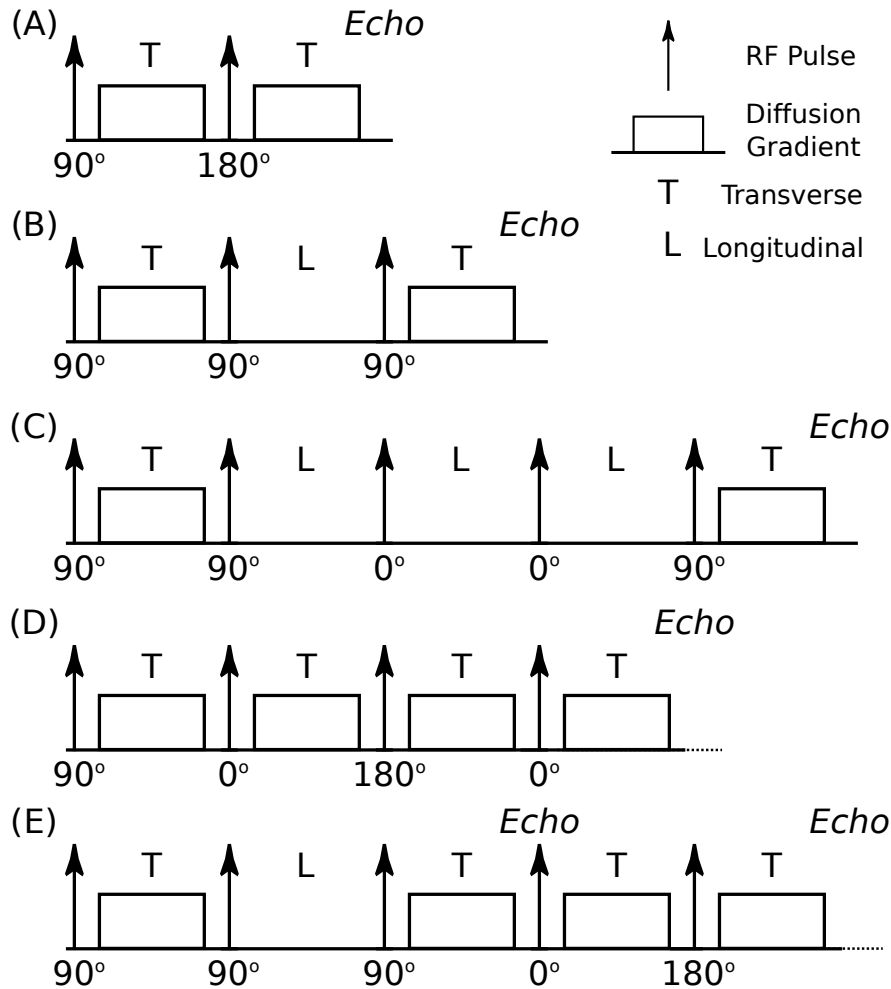

Figure S1: In DW-SSFP, repeated application of RF pulses decomposes the magnetization into a series of coherence pathways, which are sensitized to the diffusion gradient during transverse periods. Here we show 5 example coherence pathways. The spin-echo pathway (A), stimulated-echo pathway (B) and long stimulated-echo pathway (C) only survive for 2 TRs in the transverse plane, the condition for the two-transverse-period approximation (1). These pathways all experience the same  $q$ -value, but have different diffusion times, defined as  $\Delta = 1 \cdot \text{TR}$  (A),  $2 \cdot \text{TR}$  (B), and  $4 \cdot \text{TR}$  (C). For the full Buxton model (1), this condition is no longer required, and pathways can experience cumulative sensitization to the diffusion gradients over multiple TRs, such as the spin-echo pathway in (D), in addition to pathways that generate multiple echoes over their lifetime (E). This leads to pathways with different  $q$ -values, in addition to weighting of the signal by  $T_2$

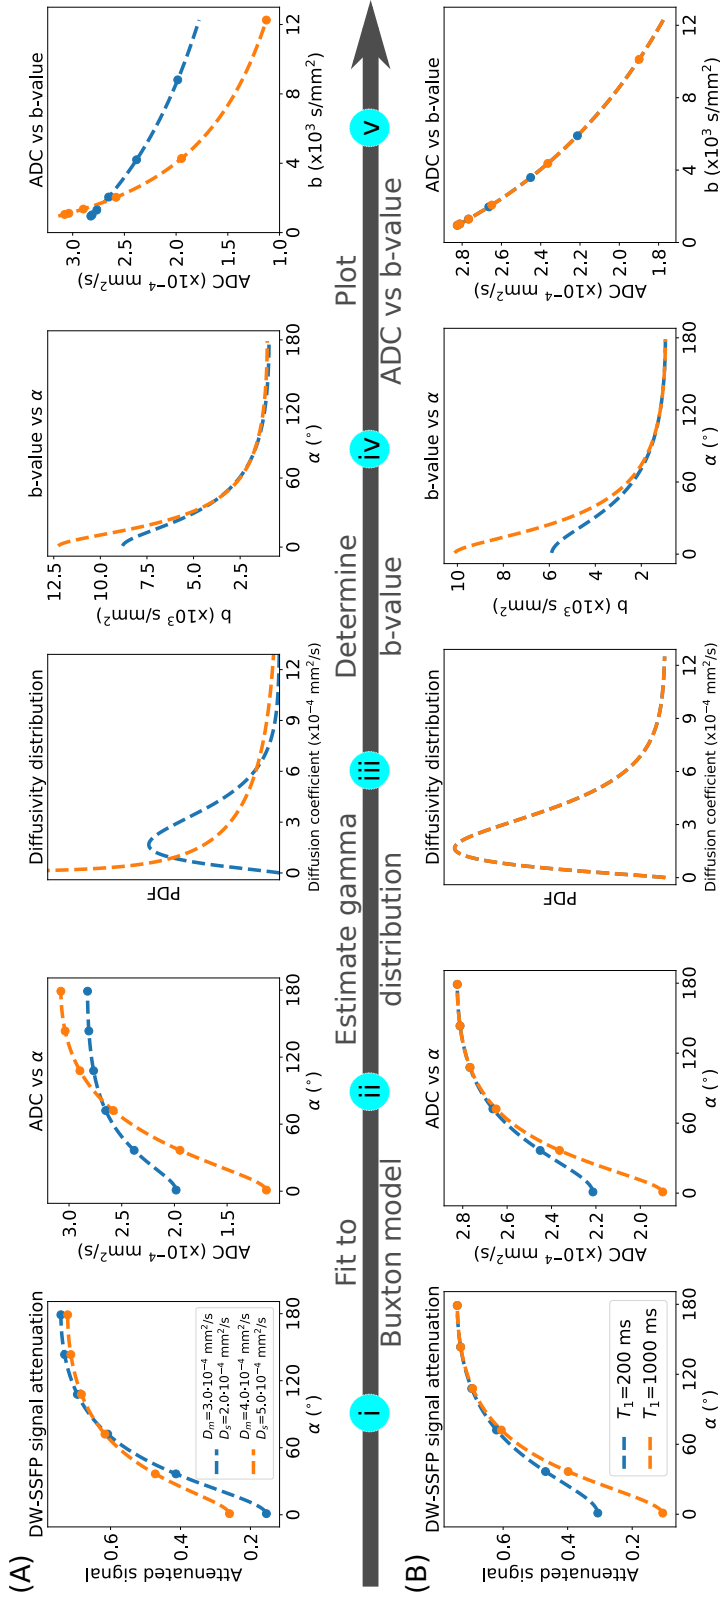

Figure S2: Processing pipeline for (A) 2 samples with different diffusion properties but identical relaxation times and (B) identical diffusion properties but different  $T_1$  values. Experimental DW-SSFP data are acquired at multiple flip angles (i, dots) and converted into ADC estimates (ii, dots) (Equation 2, main text). To eliminate the effects of  $S_0$ , we fit to the DW-SSFP signal attenuation. The DW-SSFP signal model incorporating a gamma distribution of diffusivities (Equation 4, main text) is subsequently fit to the ADC estimates at multiple flip angles (by comparing to Equation 2, main text) to determine  $D_m$  and  $D_s$  (iii). From Equation 3 in the main text and our fitted values of  $D_m$  and  $D_s$ , we can simulate the estimated ADC with b-value for a DW-SE sequence by making comparisons with the DW-SE signal under the Stejskal-Tanner model ( $S = S_0 \exp(-bD)$ ). From this, we can define an equivalent DW-SE b-value which gives rise to the same ADC estimate at each DW-SSFP flip angle (iv). Our ADC estimates with DW-SSFP can be subsequently plotted versus an effective b-value (v). In (A), this leads to distinct evolution of ADC with effective b-value for the 2 samples (v). However, in (B), the signal evolution is identical (v), despite having a different ADC evolution versus flip angle (ii), reflecting differences in the weighting of the different coherence pathways due to relaxation, leading to different effective b-values along the ADC curve (v, dots)

## Supporting Tables

### Turbo inversion recovery (TIR) - $T_1$

|            |                                    |
|------------|------------------------------------|
| Resolution | 0.65 x 0.65 x 1.30 mm <sup>3</sup> |
| TR         | 1000 ms                            |
| TE         | 12 ms                              |
| TIs        | 60, 120, 240, 480, 940 ms          |
| BW         | 170 Hz/pixel                       |

### Turbo spin echo (TSE) - $T_2$

|            |                                    |
|------------|------------------------------------|
| Resolution | 0.65 x 0.65 x 1.30 mm <sup>3</sup> |
| TR         | 1000 ms                            |
| TEs        | 11, 23, 34, 46, 57, 69 ms          |
| BW         | 163 Hz/pixel                       |

### Actual flip angle imaging (AFI) - $B_1$

|            |                                    |
|------------|------------------------------------|
| Resolution | 1.50 x 1.50 x 1.50 mm <sup>3</sup> |
| TRs        | 7, 21 ms                           |
| TE         | 2.6 ms                             |
| BW         | 263 Hz/pixel                       |

Table S1: Acquisition protocols for the  $T_1$ ,  $T_2$  and  $B_1$  maps. Before processing, a Gibbs ringing correction was applied to the TIR and TSE data (2).  $T_1$  and  $T_2$  maps were derived assuming mono-exponential signal evolution. The  $B_1$  map was obtained using the methodology described in (3)

## Supporting Derivations

### The two-transverse-period approximation with a gamma distribution of diffusivities

From Equation 1 in the main text:

$$S_{\text{SSFP}}(\alpha, T_1, T_2, \text{TR}, q, D) = \frac{-S_0(1 - E_1)E_1E_2^2 \sin \alpha}{2(1 - E_1 \cos \alpha)} \left[ \frac{1 - \cos \alpha}{E_1} A_1 + \sin^2 \alpha \sum_{n=1}^{\infty} (E_1 \cos \alpha)^{n-1} A_1^{n+1} \right], \quad [\text{S1}]$$

where  $S_0$  is the equilibrium magnetization,  $E_1 = e^{-\frac{\text{TR}}{T_1}}$ ,  $E_2 = e^{-\frac{\text{TR}}{T_2}}$ ,  $\alpha$  is the flip angle,  $n$  is the number of TRs between the two transverse-periods for a given stimulated-echo,  $A_1 = e^{-q^2 \cdot \text{TR} \cdot D}$ ,  $D$  is the diffusion coefficient and  $q = \gamma G \tau$ , where  $\gamma$  is the gyromagnetic ratio,  $G$  is the diffusion gradient amplitude and  $\tau$  is the diffusion gradient duration. Separating this expression into spin-echo (SE) and stimulated-echo (STE) pathways:

$$S_{\text{SE}} = \frac{-S_0(1 - E_1)E_2^2 \sin \alpha(1 - \cos \alpha)}{2(1 - E_1 \cos \alpha)} \cdot e^{-q^2 \cdot \text{TR} \cdot D}, \quad [\text{S2}]$$

and:

$$S_{\text{STE}} = \frac{-S_0(1 - E_1)E_1E_2^2 \sin \alpha}{2(1 - E_1 \cos \alpha)} \cdot \sin^2 \alpha \cdot \sum_{n=1}^{\infty} \left[ (E_1 \cos \alpha)^{n-1} \cdot e^{-q^2 \cdot (n+1) \cdot \text{TR} \cdot D} \right]. \quad [\text{S3}]$$

#### SE term

Integrating over the SE term with a gamma distribution of diffusivities:

$$S_{\text{SE},\Gamma} = \frac{-S_0(1 - E_1)E_2^2 \sin \alpha(1 - \cos \alpha)}{2(1 - E_1 \cos \alpha)} \cdot \int_0^{\infty} e^{-q^2 \cdot \text{TR} \cdot D} \rho(D; D_m, D_s) dD, \quad [\text{S4}]$$

where  $\rho(D; D_m, D_s)$  is the gamma distribution with mean  $D_m$  and standard deviation  $D_s$  over  $D$ . From Equation 3 in the main text:

$$\int_0^{\infty} e^{-q^2 \cdot \text{TR} \cdot D} \rho(D; D_m, D_s) dD = \left[ \frac{D_m}{D_m + q^2 \cdot \text{TR} \cdot D_s^2} \right]^{\frac{D_m^2}{D_s^2}}. \quad [\text{S5}]$$

Therefore:

$$S_{\text{SE},\Gamma} = \frac{-S_0(1 - E_1)E_2^2 \sin \alpha(1 - \cos \alpha)}{2(1 - E_1 \cos \alpha)} \cdot \left[ \frac{D_m}{D_m + q^2 \cdot \text{TR} \cdot D_s^2} \right]^{\frac{D_m^2}{D_s^2}}. \quad [\text{S6}]$$

### STE term

Integrating over the STE term with a gamma distribution:

$$S_{\text{STE},\Gamma} = \frac{-S_0(1-E_1)E_1E_2^2 \sin \alpha}{2(1-E_1 \cos \alpha)} \cdot \sin^2 \alpha \cdot \sum_{n=1}^{\infty} (E_1 \cos \alpha)^{n-1} \cdot \int_0^{\infty} e^{-q^2 \cdot (n+1) \cdot \text{TR} \cdot D} \rho(D; D_m, D_s) dD. \quad [\text{S7}]$$

Evaluating the summation term, considering Equation 3 in the main text:

$$\begin{aligned} & \sum_{n=1}^{\infty} (E_1 \cos \alpha)^{n-1} \cdot \int_0^{\infty} e^{-q^2 \cdot (n+1) \cdot \text{TR} \cdot D} \rho(D; D_m, D_s) dD \\ &= \sum_{n=1}^{\infty} (E_1 \cos \alpha)^{n-1} \cdot \left[ \frac{D_m}{D_m + q^2 \cdot (n+1) \cdot \text{TR} \cdot D_s^2} \right]^{\frac{D_m^2}{D_s^2}}, \end{aligned} \quad [\text{S8}]$$

Pulling  $D_m$  from the numerator and  $q^2 \cdot \text{TR} \cdot D_s^2$  from the denominator :

$$= \left( \frac{D_m}{q^2 \cdot \text{TR} \cdot D_s^2} \right)^{\frac{D_m^2}{D_s^2}} \cdot \sum_{n=1}^{\infty} \frac{(E_1 \cos \alpha)^{n-1}}{\left[ \frac{D_m}{q^2 \cdot \text{TR} \cdot D_s^2} + (n+1) \right]^{\frac{D_m^2}{D_s^2}}}. \quad [\text{S9}]$$

Rearranging and defining  $m = n - 1$ :

$$= \left( \frac{D_m}{q^2 \cdot \text{TR} \cdot D_s^2} \right)^{\frac{D_m^2}{D_s^2}} \cdot \sum_{m=0}^{\infty} \frac{(E_1 \cos \alpha)^m}{\left[ \left( \frac{D_m}{q^2 \cdot \text{TR} \cdot D_s^2} + 2 \right) + m \right]^{\frac{D_m^2}{D_s^2}}}. \quad [\text{S10}]$$

The summation term is in an equivalent format to the the Lerch Transcendent (4), defined as:

$$\Phi(z, s, a) = \sum_{m=0}^{\infty} \frac{z^m}{(a+m)^s}, \quad [\text{S11}]$$

where  $z = E_1 \cos \alpha$ ,  $s = \frac{D_m^2}{D_s^2}$  and  $a = \frac{D_m}{q^2 \cdot \text{TR} \cdot D_s^2} + 2$ . Therefore:

$$S_{\text{STE},\Gamma} = \frac{-S_0(1-E_1)E_1E_2^2 \sin \alpha}{2(1-E_1 \cos \alpha)} \cdot \sin^2 \alpha \cdot \left( \frac{D_m}{q^2 \cdot \text{TR} \cdot D_s^2} \right)^{\frac{D_m^2}{D_s^2}} \cdot \Phi \left( E_1 \cos \alpha, \frac{D_m^2}{D_s^2}, \frac{D_m}{q^2 \cdot \text{TR} \cdot D_s^2} + 2 \right). \quad [\text{S12}]$$

## Total signal

Summing the SE and STE terms:

$$S_{\text{SSFP},\Gamma}(\alpha, T_1, T_2, \text{TR}, q, D) = \frac{-S_0(1 - E_1)E_1E_2^2 \sin \alpha}{2(1 - E_1 \cos \alpha)} \cdot \left[ \frac{1 - \cos \alpha}{E_1} \cdot \left( \frac{D_m}{D_m + q^2 \cdot \text{TR} \cdot D_s^2} \right)^{\frac{D_m^2}{D_s^2}} + \sin^2 \alpha \cdot \left( \frac{D_m}{q^2 \cdot \text{TR} \cdot D_s^2} \right)^{\frac{D_m^2}{D_s^2}} \cdot \Phi \left( E_1 \cos \alpha, \frac{D_m^2}{D_s^2}, \frac{D_m}{q^2 \cdot \text{TR} \cdot D_s^2} + 2 \right) \right]. \quad [\text{S13}]$$

## ADC expression under the two-transverse-period approximation

Summing over Equation 1 in the main text, noting  $\sum_{m=0}^{\infty} r^m = \frac{1}{1-r}$ , or from (1):

$$S_{\text{SSFP}}(\alpha, T_1, T_2, \text{TR}, q, \text{ADC}) = -\frac{S_0(1 - E_1)(1 + E_1 A_{\text{ADC}})A_{\text{ADC}}(1 - \cos \alpha) \sin \alpha}{2(1 - E_1 \cos \alpha)(1 - A_{\text{ADC}}E_1 \cos \alpha)} \cdot E_2^2. \quad [\text{S14}]$$

Maintaining terms that depend on ADC:

$$\begin{aligned} \frac{(1 + E_1 A_{\text{ADC}})A_{\text{ADC}}}{(1 - A_{\text{ADC}}E_1 \cos \alpha)} &= \frac{S_{\text{SSFP}}(\alpha, T_1, T_2, \text{TR}, q, \text{ADC})}{S_{\text{SSFP}}(\alpha, T_1, T_2, \text{TR}, 0, \text{ADC})} \cdot \frac{1 + E_1}{1 - E_1 \cos \alpha} \\ &= S'_{\text{SSFP}}. \end{aligned} \quad [\text{S15}]$$

$S_{\text{SSFP}}(\alpha, T_1, T_2, \text{TR}, q, \text{ADC})$  and  $S_{\text{SSFP}}(\alpha, T_1, T_2, \text{TR}, 0, \text{ADC})$  can be substituted by diffusion-weighted and non diffusion-weighted data respectively. Multiplying Equation S15 by the denominator:

$$(1 + E_1 A_{\text{ADC}})A_{\text{ADC}} - S'_{\text{SSFP}} \cdot (1 - A_{\text{ADC}}E_1 \cos \alpha) = 0. \quad [\text{S16}]$$

Expanding the brackets and reordering:

$$E_1 A_{\text{ADC}}^2 + (S'_{\text{SSFP}} \cdot E_1 \cos \alpha + 1)A_{\text{ADC}} - S'_{\text{SSFP}} = 0. \quad [\text{S17}]$$

This is a quadratic equation, therefore:

$$A_{\text{ADC}} = \frac{-(S'_{\text{SSFP}} \cdot E_1 \cos \alpha + 1) \pm [(S'_{\text{SSFP}} \cdot E_1 \cos \alpha + 1)^2 + 4E_1 \cdot S'_{\text{SSFP}}]^{\frac{1}{2}}}{2E_1}. \quad [\text{S18}]$$

As  $E_1$  and  $S'_{\text{SSFP}}$  are positive, the numerator is less than 0 when we consider the negative solution. Considering  $A_{\text{ADC}} = e^{-q^2 \cdot \text{TR} \cdot \text{ADC}}$ , this would lead to a complex definition of ADC. Therefore:

$$\text{ADC} = -\frac{1}{q^2 \text{TR}} \cdot \ln \left[ \frac{-(S'_{\text{SSFP}} \cdot E_1 \cos \alpha + 1) + [(S'_{\text{SSFP}} \cdot E_1 \cos \alpha + 1)^2 + 4E_1 \cdot S'_{\text{SSFP}}]^{\frac{1}{2}}}{2E_1} \right]. \quad [\text{S19}]$$

For a Gamma distribution of diffusivities, by comparing Equation S13 to Equations S14 and S15:

$$S'_{\text{SSFP},\Gamma} = \left( \frac{D_m}{D_m + q^2 \cdot \text{TR} \cdot D_s^2} \right)^{\frac{D_m^2}{D_s^2}} + E_1 \cdot (1 + \cos \alpha) \cdot \left( \frac{D_m}{q^2 \cdot \text{TR} \cdot D_s^2} \right)^{\frac{D_m^2}{D_s^2}} \cdot \Phi \left( E_1 \cos \alpha, \frac{D_m^2}{D_s^2}, \frac{D_m}{q^2 \cdot \text{TR} \cdot D_s^2} + 2 \right). \quad [\text{S20}]$$

## References

1. Buxton RB. The diffusion sensitivity of fast steady-state free precession imaging. *Magn. Reson. Med.* 1993. doi: 10.1002/mrm.1910290212.
2. Kellner E, Dhital B, Kiselev VG, Reiser M. Gibbs-ringing artifact removal based on local subvoxel-shifts. *Magn. Reson. Med.* 2016. doi: 10.1002/mrm.26054.
3. Yarnykh VL. Actual flip-angle imaging in the pulsed steady state: A method for rapid three-dimensional mapping of the transmitted radiofrequency field. *Magn. Reson. Med.* 2007. doi: 10.1002/mrm.21120.
4. Erdilyi A, Magnus W, Oberhettinger F, Tricomi FG. Higher transcendental functions, vol. 1. *Bateman Manuscr. Proj.* McGraw-Hill, New York 1953:27–31.
